# Supplementary material for: Second Annual Report of the Research Department of the Indian Coffee Board (1948-49).
Source: Royal Society of Chemistry journal article supplement (doi:10.1039/d3cp05276a), 1950-01-01
Supplement: d3cp05276a1.pdf [file d3cp05276a1.pdf]

## *Supporting Information*

# **Enhancing CO<sub>2</sub> Electroreduction Performance through Transition Metal Atom Doping and Strain Engineering in $\gamma$ - GeSe: A First-Principles Study**

*Yu-wang Sun<sup>a</sup>, Lei Liu<sup>b</sup>, Jing-yao Liu<sup>a\*</sup>*

*<sup>a</sup> Institute of Theoretical Chemistry, College of Chemistry, Jilin  
University, Changchun 130023, China*

*<sup>b</sup> College of Chemistry, Jilin University, Changchun 130023, China*

**Submitted to : *Phys. Chem. Chem. Phys.***

---

\*Corresponding author: Dr. Jing-yao Liu;

Tel: +86 0431 88498016 Fax: +86 0431 88498026

E-mail address: [ljy121@jlu.edu.cn](mailto:ljy121@jlu.edu.cn). (J.Y. Liu)

Table S1. Standard dissolution potentials ( $U_{diss}^0(\text{bulk})$ , V), number of electrons ( $Ne$ ) involved in the dissolution for the pure metals, and calculated binding energies ( $E_b$ , eV), formation energies ( $E_f$ , eV) and dissolution potentials ( $U_{diss}$ , V ) of TM@ $\gamma$ -GeSe.

| TM@ $\gamma$ -GeSe | $E_b$ | $E_f$ | $U_{diss}^0(\text{bulk})$ | $Ne$ | $U_{diss}$ |
|--------------------|-------|-------|---------------------------|------|------------|
| Sc                 | -4.43 | 0.19  | -2.08                     | 3    | -2.14      |
| Ti                 | -4.48 | 1.69  | -1.63                     | 2    | -2.47      |
| V                  | -3.97 | 1.96  | -1.18                     | 2    | -2.16      |
| Cr                 | -3.04 | 1.39  | -0.91                     | 2    | -1.60      |
| Mn                 | -3.00 | 0.48  | -1.19                     | 2    | -1.43      |
| Fe                 | -4.02 | 1.54  | -0.45                     | 2    | -1.22      |
| Co                 | -4.79 | 0.78  | -0.28                     | 2    | -0.67      |
| Ni                 | -5.46 | 0.17  | -0.26                     | 2    | -0.35      |
| Cu                 | -3.38 | 0.48  | 0.34                      | 2    | 0.10       |
| Zn                 | -1.20 | 0.18  | -0.76                     | 2    | -0.85      |
| Y                  | -4.66 | -0.12 | -2.37                     | 3    | -2.33      |
| Zr                 | -5.29 | 1.64  | -1.45                     | 4    | -1.86      |
| Nb                 | -4.89 | 2.58  | -1.10                     | 3    | -1.96      |
| Mo                 | -6.55 | 2.71  | -0.20                     | 3    | -1.10      |
| Ru                 | -6.38 | 0.43  | 0.46                      | 2    | 0.25       |
| Rh                 | -6.96 | -0.24 | 0.60                      | 2    | 0.72       |
| Pd                 | -4.99 | -0.63 | 0.95                      | 2    | 1.27       |
| Ag                 | -2.49 | 0.38  | 0.80                      | 1    | 0.42       |
| Hf                 | -4.90 | 2.17  | -1.55                     | 4    | -2.09      |
| Ta                 | -4.97 | 3.76  | -0.60                     | 3    | -1.85      |
| W                  | -4.94 | 4.11  | 0.10                      | 3    | -1.27      |
| Re                 | -6.55 | 3.40  | 0.30                      | 3    | -0.83      |
| Os                 | -6.95 | 1.64  | 0.84                      | 8    | 0.64       |
| Ir                 | -7.47 | 0.46  | 1.16                      | 3    | 1.01       |

|    |       |       |      |   |      |
|----|-------|-------|------|---|------|
| Pt | -6.86 | -0.40 | 1.18 | 2 | 1.38 |
| Au | -3.50 | -0.12 | 1.50 | 3 | 1.54 |

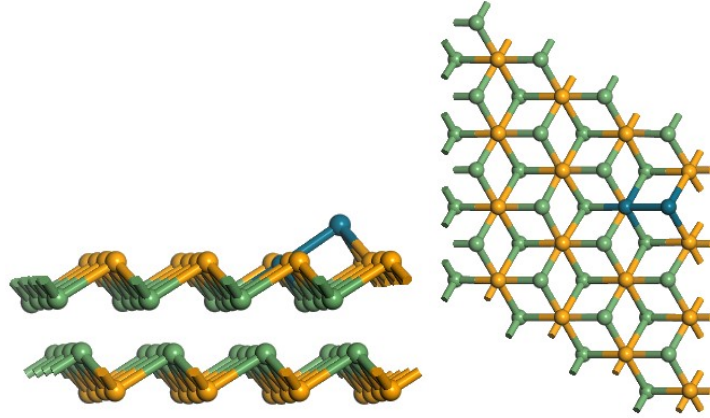

Fig. S1. Optimized structures of  $\text{TM}_2@ \gamma\text{-GeSe}$  (TM = Rh, Pd, Pt, and Au).

Table S2. Calculated formation energies ( $E_f$ , eV) of the single TM atom and two TM atoms.

| TM | $E_f(\text{TM-PtS}_2)$ | $E_f(\text{TM}_2\text{-PtS}_2)$ |
|----|------------------------|---------------------------------|
| Rh | -0.24                  | 1.05                            |
| Pd | -0.63                  | 0.40                            |
| Pt | -0.40                  | 0.91                            |
| Au | -0.12                  | 0.28                            |

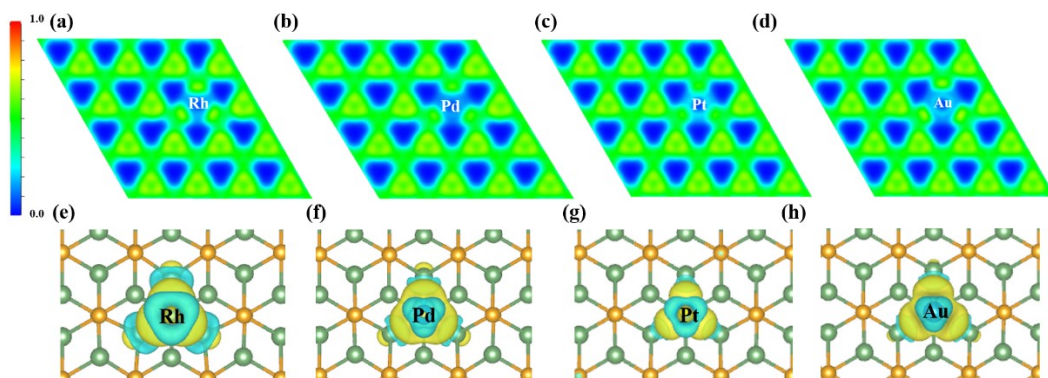

Fig. S2. (a-d) Electron location function (ELF) and (e-h) charge density difference (CDD) for  $\text{TM}@ \gamma\text{-GeSe}$  (TM = Rh, Pd, Pt, and Au). The isosurface value is 0.02  $\text{e}/\text{bohr}^3$ .

Table S3. Bader charge for TM on TM@ $\gamma$ -GeSe.

| TM@ $\gamma$ -GeSe | Bader charge ( $e^-$ ) |
|--------------------|------------------------|
| Rh                 | 0.42                   |
| Pd                 | 0.31                   |
| Pt                 | 0.57                   |
| Au                 | 0.42                   |

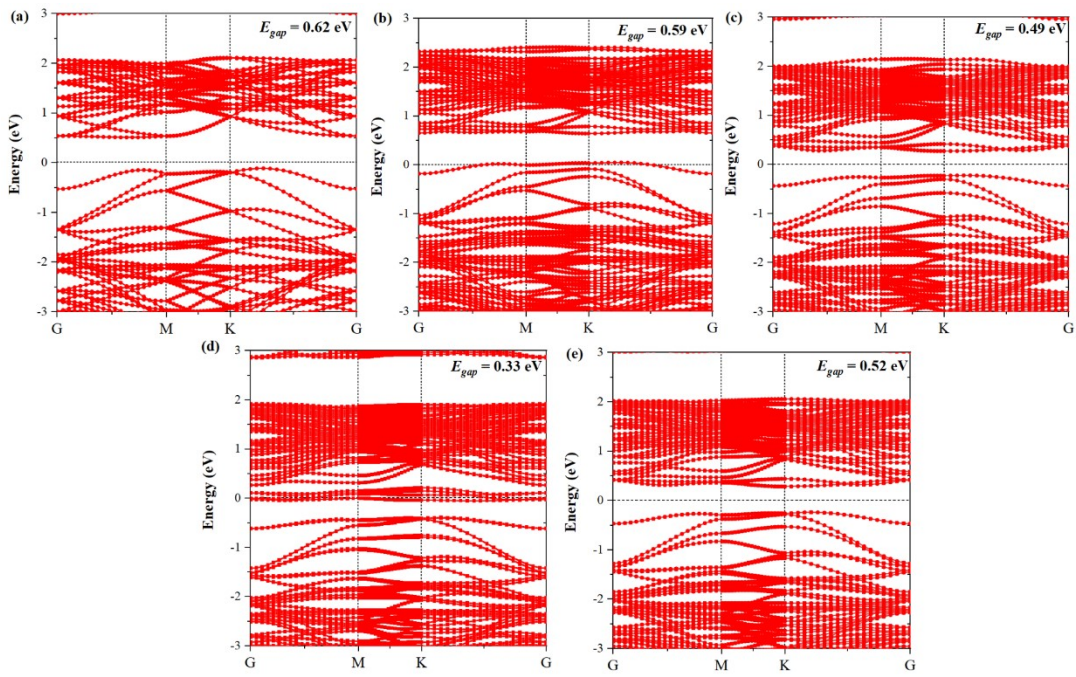

Fig. S3. Band Structures for (a)  $\gamma$ -GeSe and (b-e) TM@ $\gamma$ -GeSe (TM = Rh, Pd, Au and Pt).

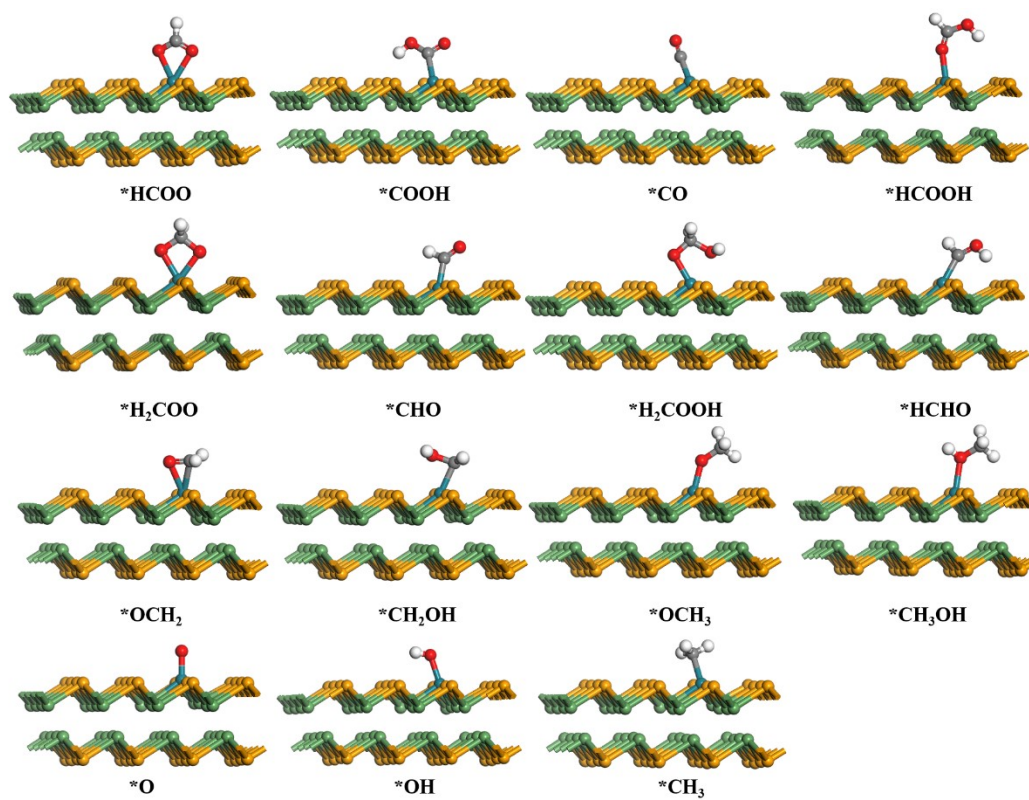

Fig. S4. Schematic intermediate structures for the  $\text{CO}_2\text{RR}$  pathways.

Table S4. Potential determining steps (PDS) of C<sub>1</sub> products and limiting potentials ( $U_L$ , V) of CO<sub>2</sub>RR and HER on various TM@ $\gamma$ -GeSe monolayers.

| TM@ $\gamma$ -<br>GeSe | PDS                    | $U_L$ (CO <sub>2</sub> RR) | Products           | $U_L$ (HER) | $U_L$ (HCOOH)<br>- $U_L$ (H <sub>2</sub> ) |
|------------------------|------------------------|----------------------------|--------------------|-------------|--------------------------------------------|
|                        |                        | -0.26                      | HCOOH              |             |                                            |
| Rh                     | *HCOO→*HCOOH           | -0.26                      | CH <sub>3</sub> OH | -0.46       | 0.20                                       |
|                        |                        | -0.26                      | CH <sub>4</sub>    |             |                                            |
|                        |                        | -1.02                      | CO                 |             |                                            |
| Pd                     | CO <sub>2</sub> →*HCOO | -0.35                      | HCOOH              | -0.66       | 0.31                                       |
|                        |                        | -0.47                      | CH <sub>3</sub> OH |             |                                            |
|                        |                        | -0.47                      | CH <sub>4</sub>    |             |                                            |
|                        |                        | -0.66                      | CO                 |             |                                            |
| Pt                     | *HCOO→*HCOOH           | -0.33                      | HCOOH              | -0.21       | -0.11                                      |
|                        |                        | -0.33                      | CH <sub>3</sub> OH |             |                                            |
|                        |                        | -0.33                      | CH <sub>4</sub>    |             |                                            |
|                        |                        | -0.55                      | CO                 |             |                                            |
| Au                     | *HCOO→*HCOOH           | -0.44                      | HCOOH              | -0.03       | -0.41                                      |
|                        |                        | -0.44                      | CH <sub>3</sub> OH |             |                                            |
|                        |                        | -0.44                      | CH <sub>4</sub>    |             |                                            |

Table S5. Calculated elastic stiffness tensor ( $C_{ij}$ , GPa), the Young's modulus (GPa), shear modulus (GPa) and Poisson's ratio of Rh@ $\gamma$ -GeSe and  $\gamma$ -GeSe.

|                    | $C_{11}$ | $C_{12}$ | $C_{66}$ | Young's<br>modulus | Shear<br>modulus | Poisson'<br>s ratio |
|--------------------|----------|----------|----------|--------------------|------------------|---------------------|
| Rh@ $\gamma$ -GeSe | 84.17    | 20.40    | 31.89    | 79.22              | 31.89            | 0.24                |
| $\gamma$ -GeSe     | 85.68    | 19.93    | 34.20    | 80.31              | 31.84            | 0.26                |

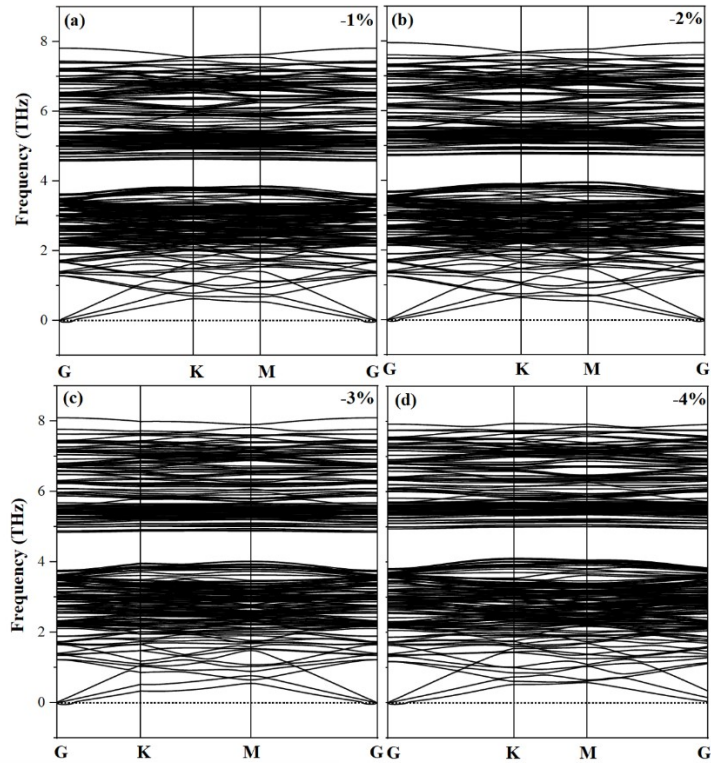

Fig. S5. Phonon dispersion for the Rh@ $\gamma$ -GeSe SACs with different compressive strains.

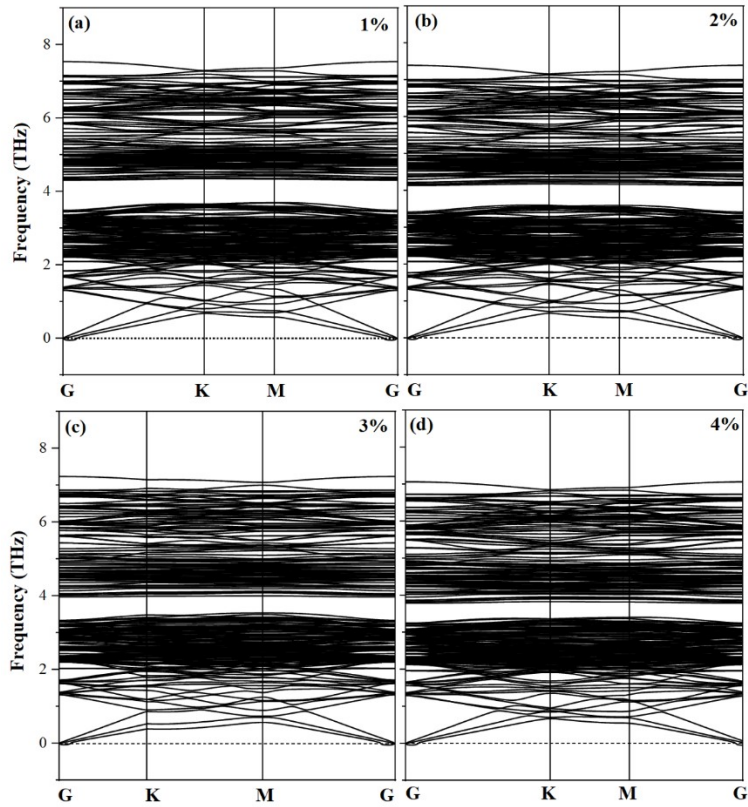

Fig. S6. Phonon dispersion for the Rh@ $\gamma$ -GeSe SACs with different tensile strains.

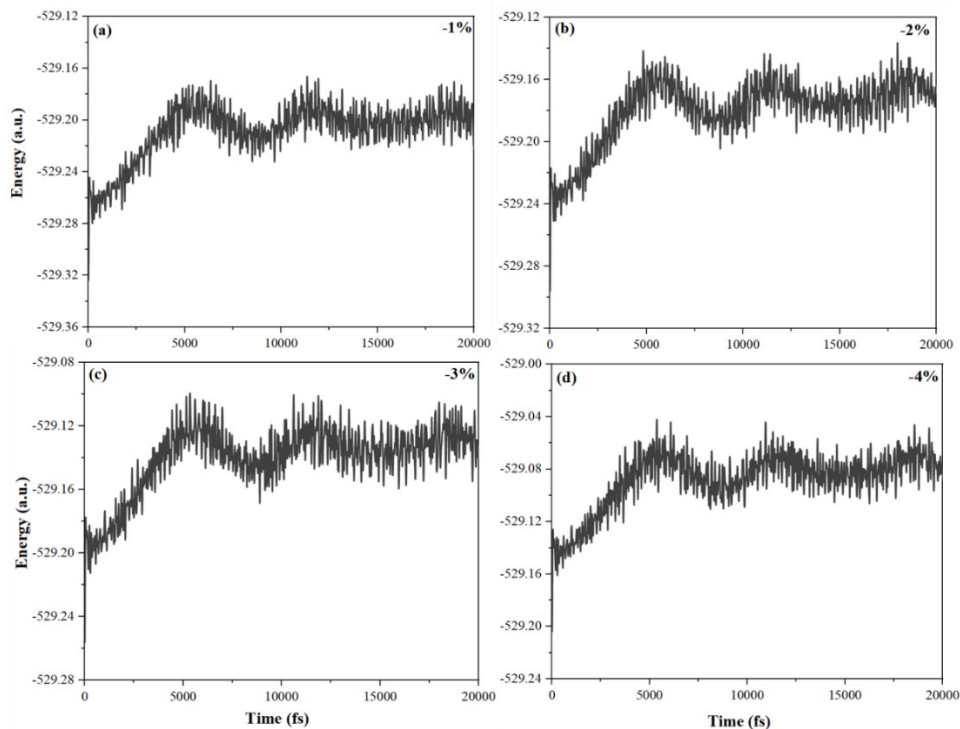

Fig. S7. Variation free energy for Rh@ $\gamma$ -GeSe SACs with different compressive strains at 400 K in the AIMD simulations totaling 20 ps time.

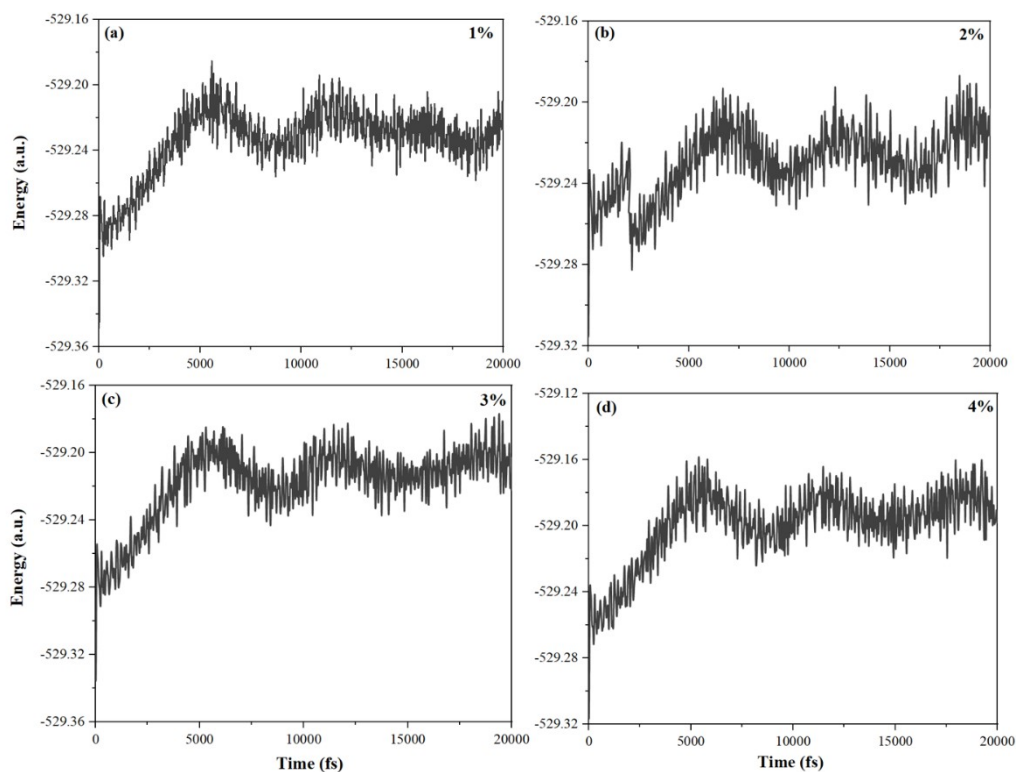

Fig. S8. Variation free energy for Rh@ $\gamma$ -GeSe SACs with different tensile strains at 400 K in the AIMD simulations totaling 20 ps time.



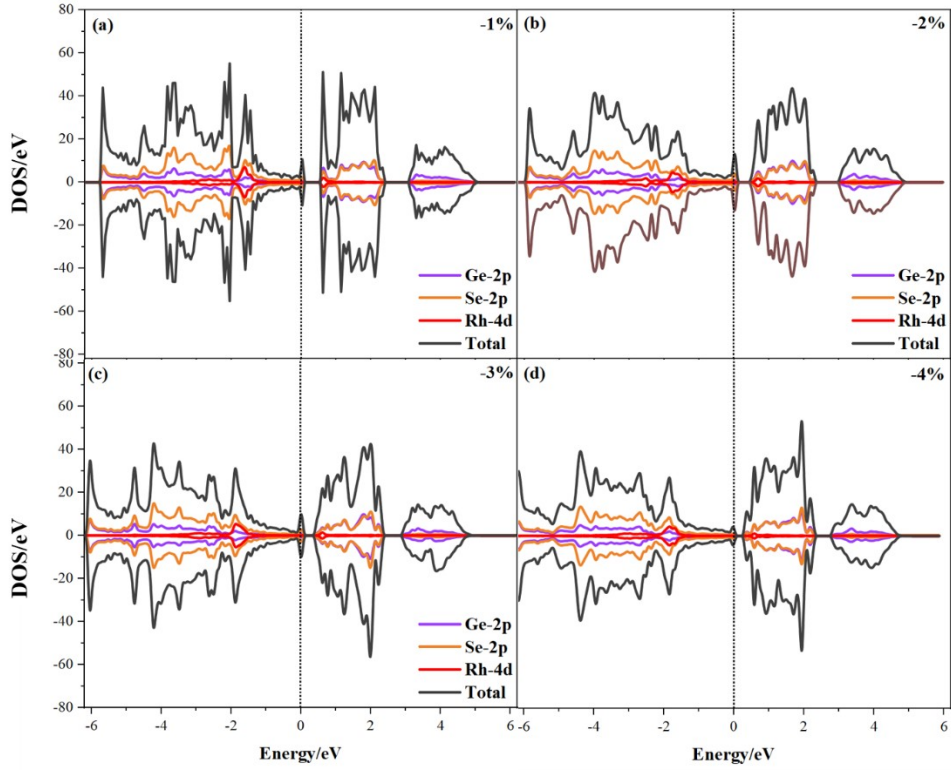

Fig. S9. Density of states for Rh@ $\gamma$ -GeSe SACs with different compressive strains (a-d).

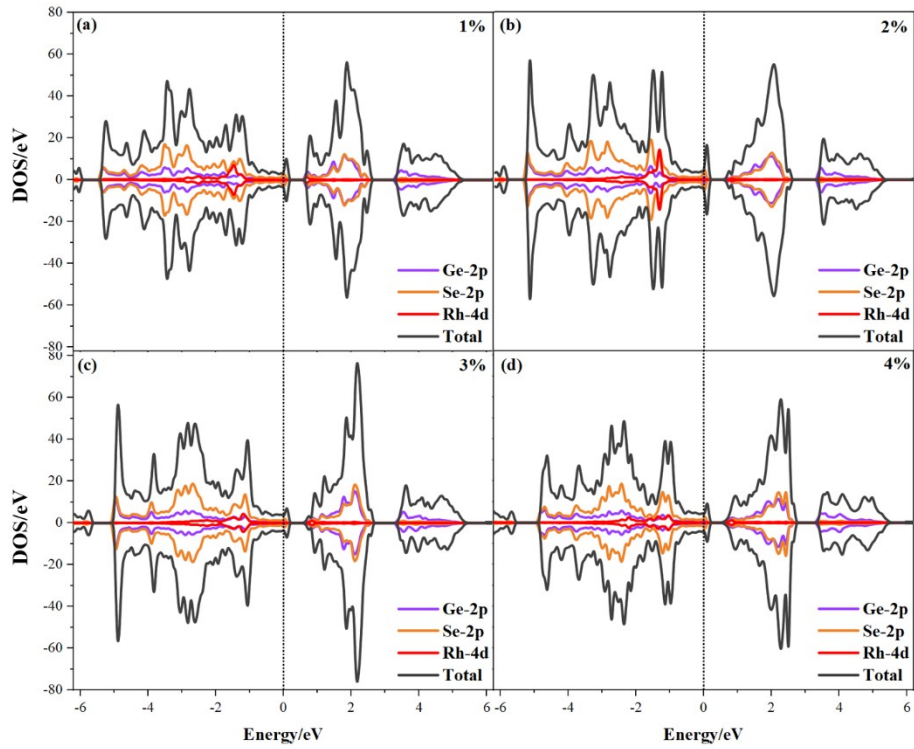

Fig. S10. Density of states for Rh@ $\gamma$ -GeSe SACs with different tensile strains (a-d).

Table S6. Potential determining steps (PDS) of C<sub>1</sub> products and limiting potentials (U<sub>L</sub>, V) of CO<sub>2</sub>RR and HER on Rh@γ-GeSe with different strains.

| Strains | PDS                    | U <sub>L</sub> (CO <sub>2</sub> RR) | Products           | U <sub>L</sub> (HER) | U <sub>L</sub> (HCOOH)<br>- U <sub>L</sub> (H <sub>2</sub> ) |
|---------|------------------------|-------------------------------------|--------------------|----------------------|--------------------------------------------------------------|
|         |                        |                                     | HCOOH              |                      |                                                              |
| -4%     | *HCOO→*HCOOH           | -0.57                               | CH <sub>3</sub> OH | -0.21                | -0.36                                                        |
|         |                        |                                     | CH <sub>4</sub>    |                      |                                                              |
|         |                        |                                     | HCOOH              |                      |                                                              |
| -3%     | *HCOO→*HCOOH           | -0.46                               | CH <sub>3</sub> OH | -0.31                | -0.15                                                        |
|         |                        |                                     | CH <sub>4</sub>    |                      |                                                              |
|         |                        |                                     | HCOOH              |                      |                                                              |
| -2%     | *HCOO→*HCOOH           | -0.42                               | CH <sub>3</sub> OH | -0.38                | -0.04                                                        |
|         |                        |                                     | CH <sub>4</sub>    |                      |                                                              |
|         |                        |                                     | HCOOH              |                      |                                                              |
| -1%     | *HCOO→*HCOOH           | -0.30                               | CH <sub>3</sub> OH | -0.43                | 0.13                                                         |
|         |                        |                                     | CH <sub>4</sub>    |                      |                                                              |
|         |                        | -0.13                               | HCOOH              |                      |                                                              |
| 1%      | CO <sub>2</sub> →*HCOO | -0.29                               | CH <sub>3</sub> OH | -0.50                | 0.37                                                         |
|         |                        | -0.29                               | CH <sub>4</sub>    |                      |                                                              |
|         |                        |                                     | HCOOH              |                      |                                                              |
| 2%      | CO <sub>2</sub> →*HCOO | -0.24                               | CH <sub>3</sub> OH | -0.66                | 0.42                                                         |
|         |                        |                                     | CH <sub>4</sub>    |                      |                                                              |
|         |                        |                                     | HCOOH              |                      |                                                              |
| 3%      | CO <sub>2</sub> →*HCOO | -0.31                               | CH <sub>3</sub> OH | -0.57                | 0.26                                                         |
|         |                        |                                     | CH <sub>4</sub>    |                      |                                                              |
|         |                        |                                     | HCOOH              |                      |                                                              |
| 4%      | CO <sub>2</sub> →*HCOO | -0.37                               | CH <sub>3</sub> OH | -0.51                | 0.14                                                         |
|         |                        |                                     | CH <sub>4</sub>    |                      |                                                              |

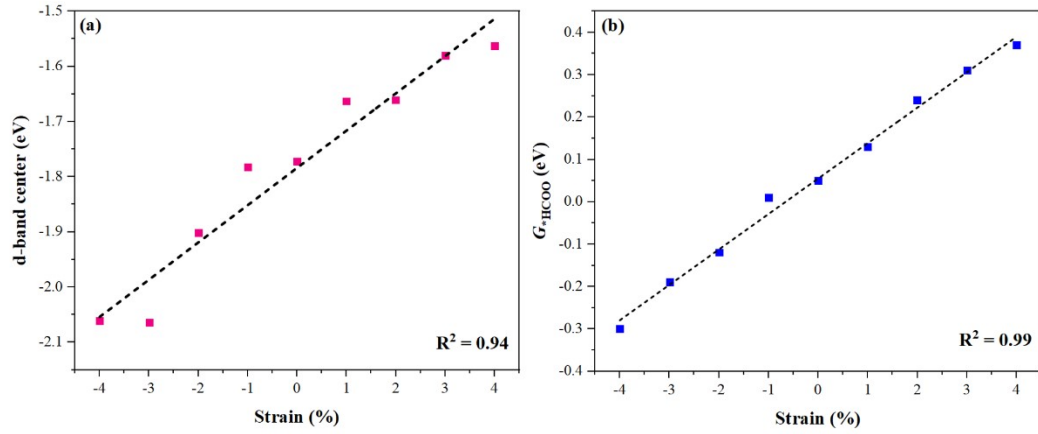

Fig. S11. Changes of (a) the d-band center, (b)  $G^*_{\text{HCOO}}$  on Rh@ $\gamma$ -GeSe as a function of strain.

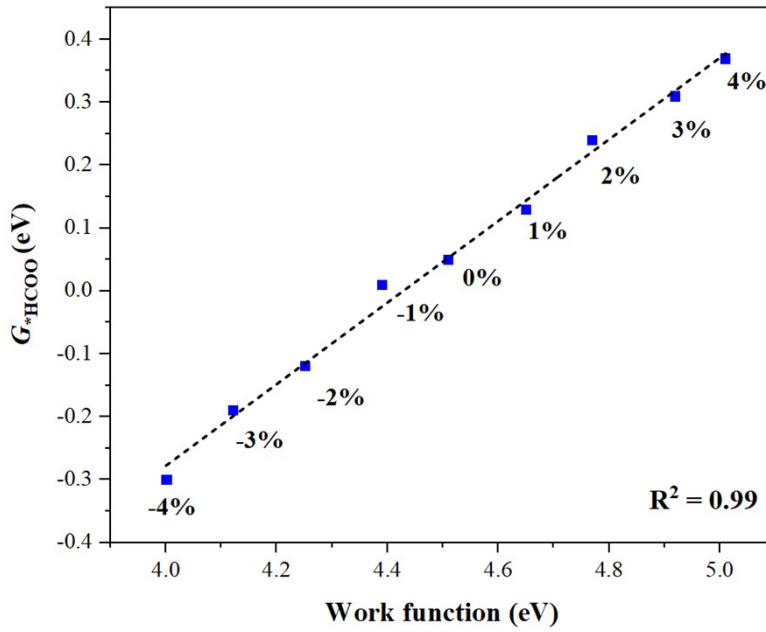

Fig. S12. Correlations between the work functions and  $G^*_{\text{HCOO}}$  under biaxial strain from -4% to 4%.
